# Supplementary material
Source: PubMed Central journal article supplement (PMC4253818)
Supplement: pro0023-1780-sd1.pdf [file pro0023-1780-sd1.pdf]

Supplementary figure:

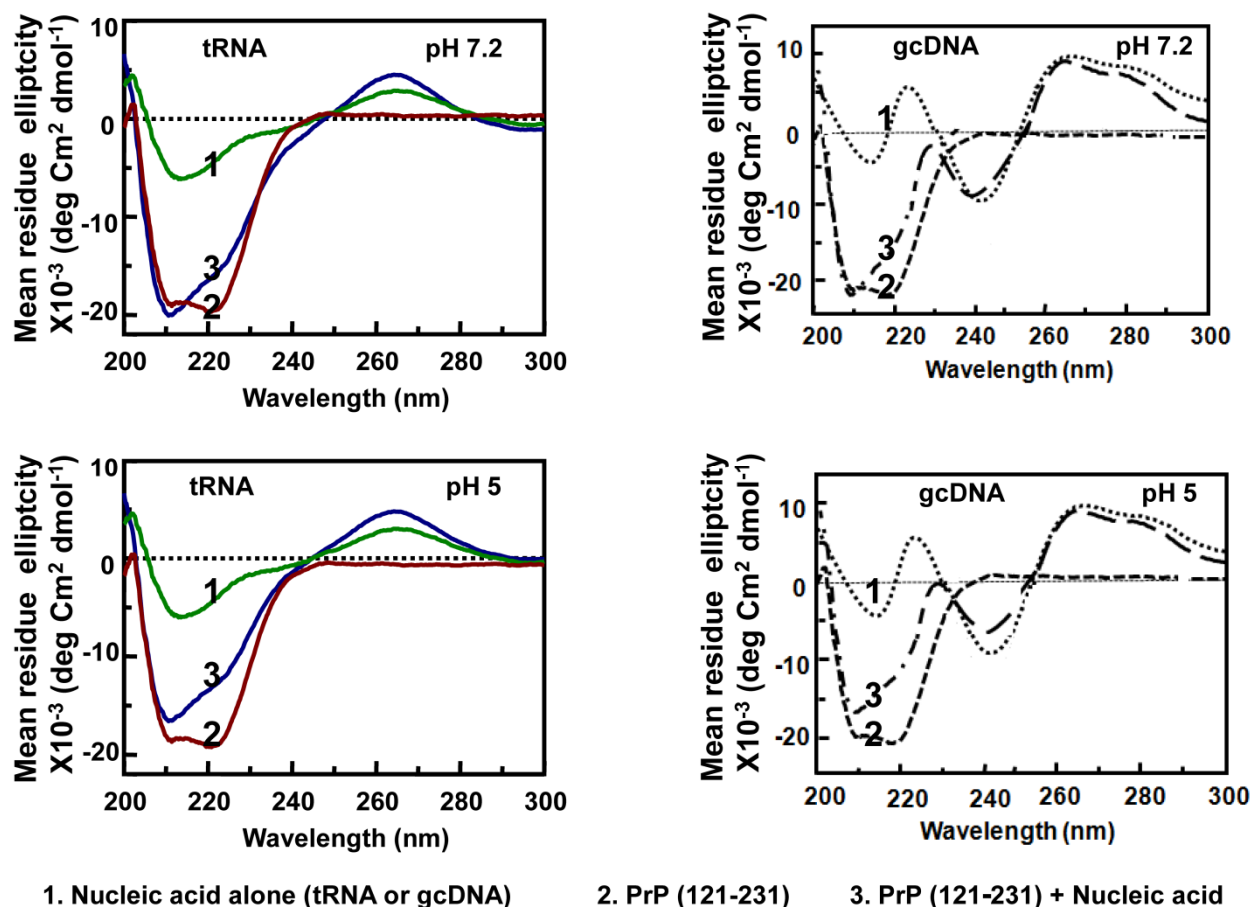

**Supplementary Figure, Fig 1s.** Representative CD signal for the free tRNA or gcDNA (10  $\mu$ M) with the 20  $\mu$ M of moPrP (121-231). The globular domain of PrP helical structure gave two characteristic peaks at 222 nm and 210 nm. There is no characteristic signal around 222 nm or 210 nm for the tRNA. Experiments were also performed with gcDNA. Data indicated that the structural elements contributed from tRNA or gcDNA is not interfering with the helical structural peaks of PrP. Previous data indicate that the secondary or tertiary structure of nucleic acids was affected by the interacting PrP protein. However, we did not see the direct helical structural contribution in CD spectra from nucleic acids towards PrP (121-231).
